# Supplementary material for: Next-Generation Sequencing Gene Panels in Inheritable Cardiomyopathies and Channelopathies: Prevalence of Pathogenic Variants and Variants of Unknown Significance in Uncommon Genes
Source: MDPI journal article supplement (doi:10.3390/biom12101417), 2022-10-03
Supplement: s1 [file s1]

Supplemental Table S1. Genes reported in literature as associated with cardiomyopathies and channelopathies

| DISEASE                                                      | Gene OMIM id | GENE     | CYTOGENETIC BAND | PROTEIN                                                          | CLIN GENE  | INHERITANCE |
|--------------------------------------------------------------|--------------|----------|------------------|------------------------------------------------------------------|------------|-------------|
| Brugada Syndrome (BrS)                                       | 601439       | ABCC9    | 12p12.1          | ATP-Binding Cassette, Subfamily C, Member 9                      | N.R.       | AD          |
|                                                              | 600465       | ANK3     | 10q21.2          | Ankyrin 3 (G)                                                    | N.R.       | AD          |
|                                                              | 611875       | CACNA1C  | 12p13.33         | α subunit α1C of the Cav1.2 calcium channel                      | Disputed   | AD          |
|                                                              | 114204       | CACNA2D1 | 7q21.11          | δ subunit Cava2δ1 of calcium channel                             | Disputed   | AD          |
|                                                              | 611876       | CACNB2   | 10p12.33-p12.31  | β subunit Cavβ2b of calcium channel                              | Disputed   | AD          |
|                                                              | 601513       | FGF12    | 3q28-q29         | Fibroblast growth factor 12                                      | N.R.       | AD          |
|                                                              | 611777       | GPD1L    | 3p22.3           | Glycerol-3-phosphate dehydrogenase 1-like                        | Disputed   | AD          |
|                                                              | 613123       | HCN4     | 15q24.1          | Hyperpolarization-activated cyclic nucleotide-gated channel 4    | Disputed   | AD          |
|                                                              | 604674       | HEY2     | 6q22             | Hairy/Enhancer of Split-related with YRPW motif 2                | N.R.       | AD          |
|                                                              | 605410       | KCND2    | 7q31.31          | α subunit of the KV4.2 potassium channel                         | N.R.       | AD          |
|                                                              | 616399       | KCND3    | 1p13.2           | α subunit of the KV4.3 potassium channel                         | Disputed   | AD          |
|                                                              | 613119       | KCNE3    | 11q13.4          | β subunit MiRP2 of potassium channel                             | Disputed   | AD          |
|                                                              | 152427       | KCNH2    | 7q36.1           | α subunit of the HERG potassium channel                          | Disputed   | AD          |
|                                                              | 600935       | KCNJ8    | 12p12.1          | α subunit of the KIR6.1 potassium channel                        | Disputed   | AD          |
|                                                              | 602861       | PKP2     | 12p11.21         | Plakophilin 2                                                    | Disputed   | AD          |
|                                                              | 607954       | RANGRF   | 17p13.1          | RAN guanine nucleotide release factor                            | Disputed   | AD          |
|                                                              | 604427       | SCN10A   | 3p22.2           | α subunit of the Nav1.8 sodium channel                           | Disputed   | AD          |
|                                                              | 612838       | SCN1B    | 19q13.12         | β subunit Navβ1 of sodium channel                                | Disputed   | AD          |
|                                                              | 601327       | SCN2B    | 11q23.3          | β subunit Navβ2 of sodium channel                                | Disputed   | AD          |
|                                                              | 613120       | SCN3B    | 11q24.1          | β subunit Navβ3 of sodium channel                                | Disputed   | AD          |
|                                                              | 601144       | SCN5A    | 3p22.2           | α subunit of the Nav1.5 sodium channel                           | Definitive | AD          |
|                                                              | 603961       | SEMA3A   | 7q21.11          | Semaphorin family protein                                        | N.R.       | AD          |
|                                                              | 602701       | SLMAP    | 3p14.3           | Sarcolemma-associated protein                                    | Disputed   | AD          |
|                                                              | 606936       | TRPM4    | 19q13.33         | Calcium-activated non-selective ion channel                      | Disputed   | AD          |
| Long QT Syndrome (LQT)                                       | 604001       | AKAP9    | 7q21.2           | A-kinase anchor protein 9                                        | Disputed   | AD          |
|                                                              | 106410       | ANK2     | 4q25-q26         | Ankyrin 2 (B)                                                    | N.R.       | AD          |
|                                                              | 114205       | CACNA1C  | 12p13.33         | α subunit α1C of the Cav1.2 calcium channel                      | Moderate   | AD          |
|                                                              | 114180       | CALM1    | 14q32.11         | Calmodulin 1                                                     | Definitive | AD          |
|                                                              | 114182       | CALM2    | 2p21             | Calmodulin 2                                                     | Definitive | AD          |
|                                                              | 114183       | CALM3    | 19q13.32         | Calmodulin 3                                                     | Definitive | AD          |
|                                                              | 601253       | CAV3     | 3p25.3           | Caveolin 3                                                       | N.R.       | AD          |
|                                                              | 176261       | KCNE1    | 21q22.11-q22.12  | Potassium voltage-gated channel subfamily E regulatory subunit 1 | Limited    | AD/AR       |
|                                                              | 603796       | KCNE2    | 21q22.11         | Potassium voltage-gated channel subfamily E regulatory subunit 2 | Disputed   | AD          |
|                                                              | 152427       | KCNH2    | 7q36.1           | α subunit of the HERG potassium channel                          | Definitive | AD          |
|                                                              | 600681       | KCNJ2    | 17q24.3          | Potassium inwardly-rectifying channel, subfamily J, member 2     | Limited    | AD/AR       |
|                                                              | 600734       | KCNJ5    | 11q24.3          | Potassium inwardly-rectifying channel, subfamily J, member 5     | Disputed   | AD          |
|                                                              | 607542       | KCNQ1    | 11p15.5-p15.4    | Kv7.1 hERG/Kv11.1                                                | Definitive | AD/AR       |
|                                                              | 602235       | KCNQ2    | 20q13.33         | Potassium voltage-gated channel subfamily Q member 2             | N.R.       | AD          |
|                                                              | 180902       | RYR2     | 1q43             | Ryanodine Receptor 2                                             | N.R.       | AD          |
|                                                              | 600235       | SCN1B    | 19q13.12         | Sodium voltage-gated channel beta subunit 1                      | N.R.       | AD          |
|                                                              | 608256       | SCN4B    | 11q23.3          | Sodium voltage-gated channel beta subunit 4                      | Disputed   | AD          |
|                                                              | 600163       | SCN5A    | 3p22.2           | α subunit of the Nav1.5 sodium channel                           | Definitive | AD          |
|                                                              | 601017       | SNTA1    | 20q11.21         | α1-Syntrophin                                                    | Disputed   | AD          |
|                                                              | 603283       | TRDN     | 6q22.31          | Triadin                                                          | Strong     | AR          |
| Short QT Syndrome (SQT)                                      | 611875       | CACNA1C  | 12p13.33         | α subunit α1C of the Cav1.2 calcium channel                      | Disputed   | AD          |
|                                                              | 114204       | CACNA2D1 | 7q21.11          | δ subunit Cava2δ1 of calcium channel                             | Disputed   | AD          |
|                                                              | 611876       | CACNB2   | 10p12.33-p12.31  | β subunit Cavβ2b of calcium channel                              | Disputed   | AD          |
|                                                              | 152427       | KCNH2    | 7q36.1           | α subunit of the HERG potassium channel                          | Definitive | AD          |
|                                                              | 600681       | KCNJ2    | 17q24.3          | Potassium inwardly-rectifying channel, subfamily J, member 2     | Moderate   | AD/AR       |
|                                                              | 607542       | KCNQ1    | 11p15.5-p15.4    | Potassium voltage gated channel, KQT-like subfamily, member 1    | Strong     | AD          |
|                                                              | 601144       | SCN5A    | 3p22.2           | α subunit of the Nav1.5 sodium channel                           | Disputed   | AD          |
| Catecholaminergic Polymorphic Ventricular Tachycardia (CPVT) | 106195       | SLC4A3   | 2q35             | Solute carrier family 4 (anion exchanger), member 3              | Moderate   | AD          |
|                                                              | 106410       | ANK2     | 4q25-q26         | Ankyrin 2 (B)                                                    | Disputed   | AD          |
|                                                              | 114180       | CALM1    | 14q32.11         | Calmodulin 1                                                     | Moderate   | AD          |
|                                                              | 114182       | CALM2    | 2p21             | Calmodulin 2                                                     | Moderate   | AD          |
|                                                              | 114183       | CALM3    | 19q13.32         | Calmodulin 3                                                     | Moderate   | AD          |
|                                                              | 114251       | CASQ2    | 1p13.1           | Calsequestrin 2                                                  | Definitive | AR          |
|                                                              | 600681       | KCNJ2    | 17q24.3          | Potassium inwardly-rectifying channel, subfamily J, member 2     | Disputed   | AR          |
|                                                              | 180902       | RYR2     | 1q43             | Ryanodine Receptor 2                                             | Definitive | AD          |
|                                                              | 603283       | TRDN     | 6q22.31          | Triadin                                                          | Definitive | AR          |
| Ionopathy (ACM)                                              | 106410       | ANK2     | 4q25-q26         | Ankyrin 2 (B)                                                    | N.R.       | AD          |
|                                                              | 114020       | CDH2     | 18q12.1          | Cadherin 2 - N-Cadherin                                          | Limited    | AD          |
|                                                              | 607667       | CTNNA3   | 10q22.2          | Catenin, alpha 3                                                 | Limited    | AD          |
|                                                              | 125660       | DES      | 2q35             | Desmin                                                           | Moderate   | AD          |
|                                                              | 125645       | DSC2     | 18q12.1          | Desmocollin 2                                                    | Definitive | AD/AR       |
|                                                              | 125671       | DSG2     | 18q12.1          | Desmoglein 2                                                     | Definitive | AD          |
|                                                              | 125647       | DSP      | 6p24             | Desmoplakin                                                      | Definitive | AD          |
|                                                              | 102565       | FLNC     | 7q32.1           | Filamin C                                                        | N.R.       | AD          |
| Ionopathy (ACM)                                              | 173325       | JUP      | 17q21            | Junction plakoglobin                                             | Definitive | AD          |

|                              |        |         |              |                                                                 |            |         |
|------------------------------|--------|---------|--------------|-----------------------------------------------------------------|------------|---------|
| Arrhythmicogenic Cardi       | 150330 | LMNA    | 1q22         | Lamin A/C                                                       | Limited    | AD      |
|                              | 602861 | PKP2    | 12p11.21     | Plakophilin 2                                                   | Definitive | AD      |
|                              | 172405 | PLN     | 6q22.31      | Phospholamban                                                   | Moderate   | AR      |
|                              | 180902 | RYR2    | 1q43         | Ryanodine receptor 2                                            | Refuted    | AD      |
|                              | 601144 | SCN5A   | 3p22.2       | α subunit of the Nav1.5 sodium channel                          | Limited    | AD      |
|                              | 190230 | TGFB3   | 14q24.3      | Transforming Growth Factor β 3                                  | Limited    | AD      |
|                              | 612658 | TJP1    | 15q13.1      | Tight Junction Protein                                          | Limited    | AD      |
|                              | 612048 | TMEM43  | 3p25.1       | Transmembrane protein 43                                        | Definitive | AD      |
|                              | 603273 | TP63    | 3q28         | Tumor Protein p63                                               | N.R.       | AD      |
|                              | 188840 | TTN     | 2q31.2       | Titin                                                           | Limited    | AD      |
|                              | 601439 | ABCC9   | 12p12.1      | ATP-Binding Cassette, Subfamily C, Member 9                     | Limited    | AD      |
|                              | 602330 | ABLM1   | 10q25.3      | Limatin (actin-binding LIM domain protein)                      | N.R.       | AD      |
|                              | 102540 | ACTC1   | 15q14        | Actin, alpha, cardiac muscle                                    | Moderate   | AD      |
| Dilated Cardiomyopathy (DCM) | 102573 | ACTN2   | 1q43         | Alpha-actinin 2                                                 | N.R.       | AD      |
|                              | 606844 | ALMS1   | 2p13.1       | ALMS1 centrosome and basal body associated protein              | N.R.       | AR      |
|                              | 609599 | ANKRD1  | 10q23.31     | Ankyrin repeat domain-containing protein 1                      | Limited    | AD      |
|                              | 608662 | ANOS    | 11p14.3      | Anoctamin 5                                                     | N.R.       | AR      |
|                              | 603883 | BAG3    | 10q26.1      | BCL2-associated athanogene                                      | Definitive | AD      |
|                              | 611414 | CALR3   | 19p13.11     | Calreticulin 3                                                  | N.R.       | AD      |
|                              | 114251 | CASQ2   | 1p13.1       | Calsequestrin 2                                                 | N.R.       | AD      |
|                              | 601253 | CAV3    | 3p25.3       | Caveolin 3                                                      | N.R.       | AD      |
|                              | 123590 | CRYAB   | 11q23.1      | Alpha B crystallin                                              | N.R.       | AD      |
|                              | 600824 | CSRP3   | 11p15.1      | Cysteine- and glycine-rich protein 3                            | Limited    | AD      |
|                              | 600435 | CTF1    | 16p11.2      | Cardiotrophin 1                                                 | Limited    | AD      |
|                              | 128239 | DAG1    | 3p21.31      | Dystroglycan, alpha                                             | N.R.       | AR      |
|                              | 125660 | DES     | 2q35         | Desmin                                                          | Definitive | AD      |
|                              | 300377 | DMD     | Xp21.2-p21.1 | Dystrophin                                                      | N.R.       | XLR     |
|                              | 605377 | DMPK    | 19q13.32     | Dystrophia myotonica protein kinase gene                        | N.R.       | AD      |
|                              | 610746 | DOLK    | 9q34.11      | Dolichol Kinase                                                 | N.R.       | AR      |
|                              | 125645 | DSC2    | 18q12.1      | Desmocollin 2                                                   | N.R.       | AD      |
|                              | 125671 | DSG2    | 18q12.1      | Desmoglein 2                                                    | Limited    | AD      |
|                              | 125647 | DSP     | 6p24         | Desmoplakin                                                     | Strong     | AD      |
|                              | 601239 | DTNA    | 18q12.1      | Dystrobrevin, alpha                                             | Limited    | AD/AR   |
|                              | 300384 | EMD     | Xq28         | Emerin                                                          | N.R.       | XLR     |
|                              | 603550 | EYA4    | 6q23.2       | Eyes absent 4                                                   | Limited    | AD      |
|                              | 300163 | FHL1    | Xq26.3       | Four-and –a-half LIM domains 1                                  | N.R.       | XLD/XLR |
|                              | 602633 | FHL2    | 2q12.2       | Four-and –a-half LIM domains 2                                  | N.R.       | AD      |
|                              | 102565 | FLNC    | 7q32.1       | Filamin C                                                       | Definitive | AD      |
|                              | 614518 | GATAD1  | 7q21.2       | GATA Zinc Finger Domain Containing Protein 1                    | Limited    | AD      |
|                              | 300644 | GLA     | Xq22.1       | Galactosidase, alpha                                            | N.R.       | XLR     |
|                              | 602366 | ILK     | 11p15.4      | Integrin-linked kinase                                          | Limited    | AD      |
|                              | 173325 | JUP     | 17q21        | Junction plakoglobin                                            | N.R.       | AD      |
|                              | 156225 | LAMA2   | 6q22.33      | Laminin Alpha, 2                                                | N.R.       | AR      |
|                              | 600133 | LAMA4   | 6q21         | Laminin Alpha, 4                                                | Limited    | AD      |
|                              | 309060 | LAMP2   | Xq24         | Lysosome-associated membrane protein 2                          | N.R.       | XLR     |
|                              | 605906 | LDB3    | 10q23.2      | LIM domain-binding 3                                            | Limited    | AD      |
|                              | 150330 | LMNA    | 1q22         | Lamin A/C                                                       | Definitive | AD      |
|                              | 600958 | MYBPC3  | 11p11.2      | Myosin-binding protein C, cardiac                               | Limited    | AD      |
|                              | 160710 | MYH6    | 14q11.2      | Alpha-myosin heavy chain 6                                      | Limited    | AD      |
|                              | 160760 | MYH7    | 14q11.2      | Myosin, heavy chain 7, cardiac muscle, beta                     | Definitive | AD      |
|                              | 160781 | MYL2    | 12q24.11     | Myosin light chain 2                                            | Limited    | AD      |
|                              | 160790 | MYL3    | 3p21.31      | Myosin light chain 3                                            | Disputed   | AD/AR   |
|                              | 603508 | MYOM1   | 18p11.31     | Myomesin 1                                                      | N.R.       | Unknown |
|                              | 605603 | MYOZ1   | 10q22.2      | Myozenin 1                                                      | N.R.       | AD/AR   |
|                              | 605602 | MYOZ2   | 4q26         | Myozenin 2                                                      | N.R.       | AD      |
|                              | 608517 | MYPN    | 10q21.3      | Myopalladin                                                     | Limited    | AD      |
|                              | 605491 | NEBL    | 10p12.31     | Nebulette                                                       | Limited    | AD      |
|                              | 613121 | NEXN    | 1p31.1       | Nexilin                                                         | Moderate   | AD      |
|                              | 600584 | NKX2-5  | 5q35.1       | NK2 homeobox 5; cardiac specific homeobox 1                     | Limited    | AD      |
|                              | 605900 | PDLIM1  | 10q23.33     | C-terminal LIM domain protein 1                                 | N.R.       | AD      |
|                              | 605889 | PDLIM3  | 4q35.1       | PDZ and LIM domain protein 3                                    | Disputed   | AD      |
|                              | 603422 | PDLIM4  | 5q31.1       | PDZ and LIM domain protein 4                                    | N.R.       | AD      |
|                              | 602861 | PKP2    | 12p11.21     | Plakophilin 2                                                   | Disputed   | AD      |
|                              | 172405 | PLN     | 6q22.31      | Phospholamban                                                   | N.R.       | AR      |
|                              | 605557 | PRDM16  | 1p36.32      | PR domain containing 16                                         | Limited    | AD      |
|                              | 602743 | PRKAG2  | 7q36.1       | Protein Kinase, AMP-Activated, Non-Catalytic, Gamma 2           | N.R.       | AD      |
|                              | 104311 | PSEN1   | 14q24.2      | Presenilin 1                                                    | Disputed   | AD      |
|                              | 600759 | PSEN2   | 1q42.13      | Presenilin 2                                                    | Limited    | AD      |
|                              | 176876 | PTPN11  | 12q24.13     | Protein-Tyrosine Phosphatase, Non-Receptor Type, 11             | N.R.       | AD      |
|                              | 613171 | RBM20   | 10q25.2      | RNA-binding motif protein 20                                    | Definitive | AD      |
|                              | 609591 | RIT1    | 1q22         | RIC-like protein without CAAX motif 1                           | N.R.       | AD      |
|                              | 180902 | RYR2    | 1q43         | Ryanodine Receptor 2                                            | N.R.       | AD      |
|                              | 601144 | SCN5A   | 3p22.2       | α subunit of the Nav1.5 sodium channel                          | Definitive | AD      |
|                              | 601411 | SGCD    | 5q33.2-q33.3 | Delta-sarcoglycan                                               | Limited    | AD      |
|                              | 603377 | SLC22A5 | 5q31.1       | Solute Carrier Family 22 (Organic Cation Transporter), Member 5 | N.R.       | AR      |

|                                   |        |        |          |                                                                   |            |           |
|-----------------------------------|--------|--------|----------|-------------------------------------------------------------------|------------|-----------|
| Hypertrophic Cardiomyopathy (HCM) | 601017 | SNTA1  | 20q11.21 | α1-Syntrophin                                                     | N.R.       | AD        |
|                                   | 182530 | SOS1   | 2p22.1   | SOS Ras/Rac guanine nucleotide exchange factor 1                  | N.R.       | AD        |
|                                   | 607723 | SUN1   | 7p22.3   | SAD1 and UNC84 domain-containing protein 1                        | N.R.       | AD        |
|                                   | 613569 | SUN2   | 22q13.1  | SAD1 and UNC84 domain-containing protein 2                        | N.R.       | AD        |
|                                   | 608441 | SYNE1  | 6q25.2   | Nesprin 1, Synaptic nuclear envelop protein 1                     | N.R.       | AD        |
|                                   | 608442 | SYNE2  | 14q23.2  | Nesprin 2, Synaptic nuclear envelop protein 2                     | N.R.       | AD        |
|                                   | 300394 | TAZ    | Xq28     | Tafazzin                                                          | N.R.       | XLR       |
|                                   | 601620 | TBX5   | 12q24.21 | T-box 5                                                           | N.R.       | AD        |
|                                   | 604488 | TCAP   | 17q12    | Titin-cap; telethonin                                             | Limited    | AD/AR     |
|                                   | 603306 | TCF21  | 6q23.2   | Transcription factor 21, epicardin                                | N.R.       | AD        |
|                                   | 190230 | TGFB3  | 14q24.3  | Transforming Growth Factor β 3                                    | N.R.       | AD        |
|                                   | 612048 | TMEM43 | 3p25.1   | Transmembrane protein 43                                          | N.R.       | AD        |
|                                   | 188380 | TMPO   | 12q23.1  | Thymopoietin                                                      | N.R.       | AD        |
|                                   | 191040 | TNNC1  | 3p21.1   | Cardiac troponin C                                                | Definitive | AD        |
|                                   | 191044 | TNNI3  | 19q13.42 | Cardiac troponin I3                                               | Moderate   | AD        |
|                                   | 191045 | TNNT2  | 1q32.1   | Cardiac troponin T2                                               | Definitive | AD        |
|                                   | 191010 | TPM1   | 15q22.2  | Tropomyosin 1                                                     | Moderate   | AD        |
|                                   | 188840 | TTN    | 2q31.2   | Titin                                                             | Definitive | AD        |
|                                   | 176300 | TTR    | 18q12.1  | Transthyretin                                                     | N.R.       | AD        |
|                                   | 193065 | VCL    | 10q22.2  | Vinculin                                                          | Moderate   | AD        |
|                                   | 102540 | ACTC1  | 15q14    | Actin, alpha, cardiac muscle                                      | Definitive | AD        |
|                                   | 102573 | ACTN2  | 1q43     | Alpha-actinin 2                                                   | Moderate   | AD        |
|                                   | 617608 | ALPK3  | 15q25.3  | Alpha kinase 3                                                    | Strong     | AR        |
|                                   | 603883 | BAG3   | 10q26.1  | BCL2-associated athanogene                                        | N.R.       | AD        |
|                                   | 611414 | CALR3  | 19p13.11 | Calreticulin 3                                                    | Limited    | AD        |
|                                   | 601253 | CAV3   | 3p25.3   | Caveolin 3                                                        | N.R.       | AD        |
|                                   | 123590 | CRYAB  | 11q23.1  | Alpha B crystallin                                                | N.R.       | AD        |
|                                   | 600824 | CSRP3  | 11p15.1  | Cysteine- and glycine-rich protein 3                              | Moderate   | AD        |
|                                   | 125660 | DES    | 2q35     | Desmin                                                            | N.R.       | AD        |
|                                   | 300163 | FHL1   | Xq26.3   | Four-and –a-half LIM domains 1                                    | N.R.       | XLRD/XLRR |
|                                   | 602633 | FHL2   | 2q12.2   | Four-and –a-half LIM domains 2                                    | N.R.       | AD        |
|                                   | 102565 | FLNC   | 7q32.1   | Filamin C                                                         | Definitive | AD        |
|                                   | 300644 | GLA    | Xq22.1   | Galactosidase, alpha                                              | N.R.       | XLR       |
|                                   | 602366 | ILK    | 11p15.4  | Integrin-linked kinase                                            | N.R.       | AD        |
|                                   | 605267 | JPH2   | 20q13.12 | Junctophilin 2                                                    | Moderate   | AD        |
|                                   | 309060 | LAMP2  | Xq24     | Lysosome-associated membrane protein 2                            | N.R.       | XLR       |
|                                   | 605906 | LDB3   | 10q23.2  | LIM domain-binding 3                                              | N.R.       | AD        |
|                                   | 600958 | MYBPC3 | 11p11.2  | Myosin-binding protein C, cardiac                                 | Definitive | AD        |
|                                   | 160710 | MYH6   | 14q11.2  | Alpha-myosin heavy chain 6                                        | Limited    | AD        |
|                                   | 160760 | MYH7   | 14q11.2  | Myosin, heavy chain 7, cardiac muscle, beta                       | Definitive | AD        |
|                                   | 609928 | MYH7B  | 20q11.22 | Myosin Heavy Chain 7B                                             | N.R.       | AD        |
|                                   | 160781 | MYL2   | 12q24.11 | Myosin light chain 2                                              | Definitive | AD        |
|                                   | 160790 | MYL3   | 3p21.31  | Myosin light chain 3                                              | Definitive | AD/AR     |
|                                   | 606566 | MYLK2  | 20q11.21 | Myosin light chain kinase 2                                       | Limited    | AD        |
|                                   | 605603 | MYOZ1  | 10q22.2  | Myozenin 1                                                        | N.R.       | AD/AR     |
|                                   | 605602 | MYOZ2  | 4q26     | Myozenin 2                                                        | Limited    | AD        |
|                                   | 608517 | MYPN   | 10q21.3  | Myopalladin                                                       | Limited    | AD        |
|                                   | 613121 | NEXN   | 1p31.1   | Nexilin                                                           | Limited    | AD        |
|                                   | 605900 | PDLIM1 | 10q23.33 | C-terminal LIM domain protein 1                                   | N.R.       | AD        |
|                                   | 605889 | PDLIM3 | 4q35.1   | PDZ and LIM domain protein 3                                      | Limited    | AD        |
|                                   | 603422 | PDLIM4 | 5q31.1   | PDZ and LIM domain protein 4                                      | N.R.       | AD        |
|                                   | 172405 | PLN    | 6q22.31  | Phospholamban                                                     | Definitive | AD        |
|                                   | 602743 | PRKAG2 | 7q36.1   | Protein Kinase, AMP-Activated, Non-Catalytic, Gamma 2             | Definitive | AD        |
|                                   | 176876 | PTPN11 | 12q24.13 | Protein-Tyrosine Phosphatase, Non-Receptor Type, 11               | N.R.       | AD        |
|                                   | 604488 | TCAP   | 17q12    | Titin-cap; telethonin                                             | Limited    | AD /AR    |
|                                   | 612418 | TMEM70 | 8q21.11  | Mitochondrial complex V (ATP synthase) deficiency, nuclear type 2 | N.R.       | AR        |
|                                   | 191040 | TNNC1  | 3p21.1   | Cardiac troponin C                                                | Moderate   | AD        |
|                                   | 191044 | TNNI3  | 19q13.42 | Cardiac troponin I3                                               | Definitive | AD        |
|                                   | 191045 | TNNT2  | 1q32.1   | Cardiac troponin T2                                               | Definitive | AD        |
|                                   | 191010 | TPM1   | 15q22.2  | Tropomyosin 1                                                     | Definitive | AD        |
|                                   | 188840 | TTN    | 2q31.2   | Titin                                                             | Limited    | AD        |
|                                   | 176300 | TTR    | 18q12.1  | Transthyretin                                                     | N.R.       | AD        |
|                                   | 193065 | VCL    | 10q22.2  | Vinculin                                                          | limited    | AD        |
| Restrictive Cardiomyopathy(RCM)   | 102540 | ACTC1  | 15q14    | Actin, alpha, cardiac muscle                                      | N.R.       | AD        |
|                                   | 123590 | CRYAB  | 11q23.1  | Alpha B crystallin                                                | N.R.       | AD        |
|                                   | 125660 | DES    | 2q35     | Desmin                                                            | N.R.       | AD        |
|                                   | 160760 | MYH7   | 14q11.2  | Myosin, heavy chain 7, cardiac muscle, beta                       | N.R.       | AD        |
|                                   | 160790 | MYL3   | 3p21.31  | Myosin light chain 3                                              | N.R.       | AD/AR     |
|                                   | 608517 | MYPN   | 10q21.3  | Myopalladin                                                       | N.R.       | AD        |
|                                   | 191040 | TNNC1  | 3p21.1   | Cardiac troponin C                                                | N.R.       | AD        |
|                                   | 191044 | TNNI3  | 19q13.42 | Cardiac troponin I3                                               | N.R.       | AD        |
|                                   | 191045 | TNNT2  | 1q32.1   | Cardiac troponin T2                                               | N.R.       | AD        |
|                                   | 191010 | TPM1   | 15q22.2  | Tropomyosin 1                                                     | N.R.       | AD        |
|                                   |        |        |          |                                                                   |            |           |
